# Supplementary material for: Evolution of HER2-low expression from primary to recurrent breast cancer
Source: PubMed Central journal article supplement (PMC8511010; doi:10.1038/s41523-021-00343-4), 2021-10-12

## Supplementary methods

The immunohistochemistry assays for HER2 adopted were (all FDA approved):

- Center #1
  - o Until 2008 Hercept-Test®, DAKO (ref. number 2007333; 1:1000 dilution)
    - Number of primary BC cases=223\*
    - Number of relapse biopsy cases=35
  - o 2009-2011 Pathway®, Ventana (clone 4B5) (ref. number 780-4422; 1:3000 dilution)
    - Number of primary BC cases=131\*
    - Number of relapse biopsy cases=74
  - o Since 2012 Bond Oracle®, Leica (clone CB11) (ref. number 780-4422, 1:1000 dilution)
    - Number of primary BC cases=144\*
    - Number of relapse biopsy cases=390

\*1 missing case

- Center #2
  - o Until 2016 Hercept-Test®, DAKO (ref. number 2007333; 1:1000 dilution)
    - Number of primary BC cases=37
    - Number of relapse biopsy cases=5
  - o Since 2016 Pathway®, Ventana (clone 4B5) (ref. number 780-4422; 1:3000 dilution)
    - Number of primary BC cases=11
    - Number of relapse biopsy cases=43

No differences in HER2 expression discordance was observed across different IHC protocols (p=0.177).

## Supplementary results

|                                                | HR+/HER2 (N=336) |                  |       |                  | TN (N=79)        |                  |       |                  |
|------------------------------------------------|------------------|------------------|-------|------------------|------------------|------------------|-------|------------------|
|                                                | HER2-0           | HER2-LOW         | p     | Total            | HER2-0           | HER2-LOW         | p     | Total            |
| Age at primary BC diagnosis, median yy (Q1-Q3) | 52.8 (43.2-61.8) | 54.3 (45.5-65.4) | 0.095 | 53.6 (44.2-63.0) | 52.1 (41.3-61.1) | 53.4 (44.6-64.7) | 0.730 | 52.3 (42.5-61.2) |

|                                          |                            |                  |                   |       |                  |                  |                  |       |                  |
|------------------------------------------|----------------------------|------------------|-------------------|-------|------------------|------------------|------------------|-------|------------------|
| Histotype, n (%)                         | Ductal                     | 125 (71.8)       | 131 (82.9)        | 0.056 | 256 (76.2)       | 43 (84.3)        | 24 (85.7)        | 0.986 | 67 (84.8)        |
|                                          | Non-ductal                 | 49 (28.2)        | 27 (17.1)         |       | 76 (22.6)        | 8 (15.7)         | 4 (14.3)         |       | 12 (15.2)        |
|                                          | Missing                    | 4 (1.2)          |                   |       |                  | 0 (0)            |                  |       |                  |
| Histologic Grade, n (%)                  | 1                          | 12 (7.3)         | 13 (8.5)          | 0.190 | 25 (7.4)         | 0 (0.0)          | 0 (0.0)          | 0.452 | 0 (0.0)          |
|                                          | 2                          | 88 (53.3)        | 66 (43.1)         |       | 154 (45.8)       | 4 (8.2)          | 4 (14.3)         |       | 8 (10.1)         |
|                                          | 3                          | 65 (39.4)        | 74 (48.4)         |       | 139 (41.4)       | 45 (91.8)        | 24 (85.7)        |       | 69 (87.3)        |
|                                          | Missing                    | 18 (5.3)         |                   |       |                  | 18 (5.4)         | 2 (2.5)          |       |                  |
| Stage at diagnosis, n (%)                | Early                      | 164 (93.7)       | 146 (93.0)        | 0.482 | 310 (92.3)       | 51 (100)         | 27 (96.4)        | 0.354 | 78 (98.7)        |
|                                          | Stage IV                   | 11 (6.3)         | 11 (7.0)          |       | 22 (6.5)         | 0 (0.0)          | 1 (3.6)          |       | 1 (1.3)          |
|                                          | Missing                    | 4 (1.2)          |                   |       |                  | 0 (0)            |                  |       |                  |
| Primary BC Luminal-like phenotype, n (%) | Luminal A-like (Ki67 <20%) | 77 (48.1)        | 55 (35.2)         | 0.023 | 132 (39.3)       | ---              | ---              | ---   | ---              |
|                                          | Luminal B-like (Ki67 >20%) | 83 (51.9)        | 101 (64.8)        |       | 184 (54.8)       | ---              | ---              |       | ---              |
|                                          | Missing                    | 20 (6.0)         |                   |       |                  | ---              |                  |       |                  |
| Primary BC ER, % mean (Q1-Q3)            |                            | 71.2 (60.0-90.0) | 76.8 (70.0-90.0)  | 0.032 | 73.9 (70.0-90.0) | ---              | ---              | ---   | ---              |
| Primary BC PgR, % mean (Q1-Q3)           |                            | 52.7 (20.0-80.0) | 47.3 (13.75-80.0) | 0.155 | 50.1 (15.0-80.0) | ---              | ---              | ---   | ---              |
| Primary BCKi67, % mean (Q1-Q3)           |                            | 23.4 (10.0-34.3) | 27.1 (15.0-38.7)  | 0.053 | 25.2 (10.0-35.0) | 50.5 (25.0-70.0) | 44.8 (28.5-67.5) | 0.334 | 48.4 (28.0-70.0) |

Supplementary Table 1 clinicopathological features of HER2-0 vs HER2-low BC according to primary BC subtype.

% are calculated among available case. % of total cases with missing information is also reported for each variable.

|                                                | HR+/HER2 (N=301)           |                   |                   |                  | TN (N=116)       |                  |                  |                  |                  |
|------------------------------------------------|----------------------------|-------------------|-------------------|------------------|------------------|------------------|------------------|------------------|------------------|
|                                                | HER2-0                     | HER2-LOW          | p                 | Total            | HER2-0           | HER2-LOW         | p                | Total            |                  |
| Age at primary BC diagnosis, median yy (Q1-Q3) | 55.8 (44.8-64.8)           | 50.3 (42.7-61.9)  | 0.018             | 53.4 (44.4-63.2) | 52.3 (43.9-62.3) | 52.1 (42.2-63.0) | 0.945            | 52.2 (43.1-62.2) |                  |
| Recurrent BC Luminal-like phenotype, n (%)     | Luminal A-like (Ki67 <20%) | 38 (40.9)         | 40 (36.4)         | 0.563            | 78 (25.9)        | ---              | ---              | ---              |                  |
|                                                | Luminal B-like (Ki67 >20%) | 55 (59.1)         | 70 (63.6)         |                  | 125 (41.5)       | ---              | ---              |                  |                  |
|                                                | Missing                    | 98 (32.6)         |                   |                  |                  | ---              |                  |                  |                  |
| Recurrent BC ER, % mean (Q1-Q3)                |                            | 77.53 (70.0-95.0) | 79.41 (80.0-90.0) | 0.529            | 78.6 (70.0-90.0) | ---              | ---              | ---              | ---              |
| Recurrent BC PgR, % mean (Q1-Q3)               |                            | 29.5 (0.0-62.5)   | 37.4 (0.0-70.0)   | 0.632            | 30.6 (0.0-70.0)  | ---              | ---              | ---              | ---              |
| Recurrent BC Ki67, % mean (Q1-Q3)              |                            | 25.4 (10.0-40.0)  | 27.9 (15.0-40.0)  | 0.350            | 26.7 (12.0-40.0) | 38.9 (10.0-65.5) | 44.2 (20.0-61.2) | 0.434            | 40.9 (11.2-64.2) |

Supplementary Table 2 clinicopathological features of HER2-0 vs HER2-low BC according to recurrent BC subtype.

|                   |                      | Primary BC |            |       | Recurrent/Stage IV BC |            |       |
|-------------------|----------------------|------------|------------|-------|-----------------------|------------|-------|
|                   |                      | HER2-0     | HER2-low   | p     | HER2-0                | HER2-low   | p     |
| Primary BC sample | Surgery              | 174 (58.8) | 122 (41.2) | 0.016 | -                     | -          | -     |
|                   | Biopsy               | 54 (45.4)  | 65 (54.6)  |       | -                     | -          |       |
| Relapse samples   | Locoregional relapse | -          | -          | -     | 84 (50.3)             | 83 (49.7)  | 0.765 |
|                   | Distant metastasis   | -          | -          | -     | 131 (52.0)            | 121 (48.0) |       |
| Relapse sites     | Liver                | -          | -          | -     | 61 (46.6)             | 70 (53.4)  | 0.443 |
|                   | Lung/pleura          | -          | -          | -     | 17 (51.5)             | 16 (48.5)  |       |
|                   | Bone                 | -          | -          | -     | 16 (66.7)             | 8 (33.3)   |       |
|                   | CNS                  | -          | -          | -     | 4 (50.0)              | 4 (50.0)   |       |
|                   | Lymph-node           | -          | -          | -     | 38 (59.4)             | 26 (40.0)  |       |
|                   | Soft tissue/skin     | -          | -          | -     | 67 (48.6)             | 71 (51.4)  |       |
|                   | Other sites          | -          | -          | -     | 12 (57.1)             | 9 (42.9)   |       |

Supplementary Table 3 HER2 expression according to type of tumor sample in the HER2-negative cohort

|                                                |            | HER2 discordance status |                  |        |
|------------------------------------------------|------------|-------------------------|------------------|--------|
|                                                |            | HER2 concordant         | HER2 discordant  | p      |
| Age at primary BC diagnosis, median yy (Q1-Q3) |            | 51.1 (43.2-63.4)        | 52.0 (43.7-62.1) | 0.957  |
| Primary BC histotype, n (%)                    | Ductal     | 274 (81.5)              | 163 (79.5)       | 0.273  |
|                                                | Non-ductal | 62 (18.5)               | 43 (20.5)        |        |
| Primary BC histologic Grade, n (%)             | 1          | 14 (4.3)                | 13 (5.2)         | 0.328  |
|                                                | 2          | 113 (34.7)              | 74 (37.8)        |        |
|                                                | 3          | 199 (61.0)              | 109 (55.6)       |        |
| Stage at diagnosis, n (%)                      | Early      | 315 (94.0)              | 194 (94.2)       | 0.552  |
|                                                | Stage IV   | 20 (6.0)                | 12 (5.8)         |        |
| Primary BC phenotype, n (%)                    | HR+/HER2-  | 183 (54.1)              | 153 (73.6)       | <0.001 |
|                                                | TN         | 50 (14.8)               | 29 (13.9)        |        |
|                                                | HER2+      | 105 (31.1)              | 26 (12.5)        |        |
| Primary BCKi67, % mean (Q1-Q3)                 |            | 30.3 (15.0-40.0)        | 28.7 (10.0-40.0) | 0.304  |

Supplementary Table 4 clinicopathologic features according to HER2 discordance status

**Supplementary Figure 1 HER2 evolution from primary BC to relapse according to IHC scores**

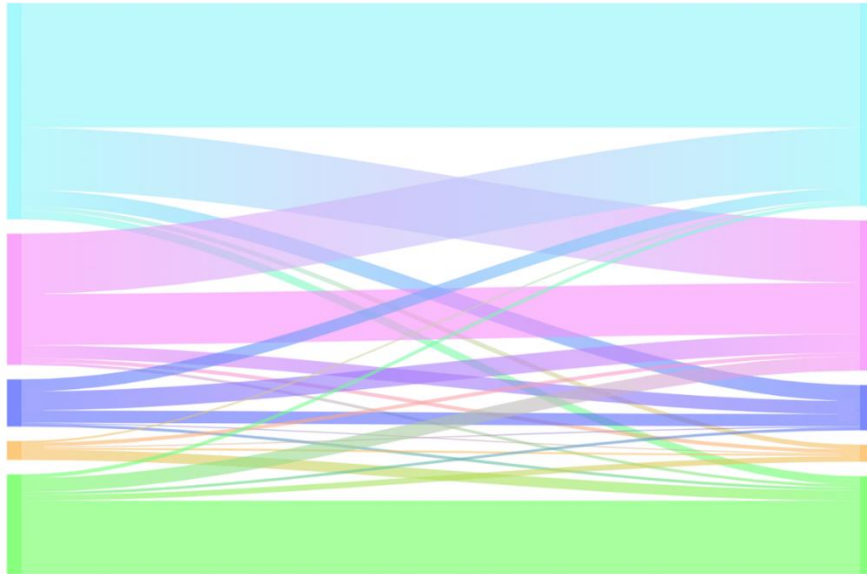

|                           |         | HER2 recurrence/metastasis N,% |            |           |          |            |
|---------------------------|---------|--------------------------------|------------|-----------|----------|------------|
|                           |         | 0                              | 1+         | 2+ N.A.   | 2+ A.    | 3+         |
| HER2<br>primary BC<br>N,% | 0       | 132 (24.3%)                    | 66 (12.1%) | 17 (3.1%) | 5 (0.9%) | 9 (1.7%)   |
|                           | 1+      | 64 (11.8%)                     | 54 (9.9%)  | 14 (2.6%) | 4 (0.7%) | 3 (0.6%)   |
|                           | 2+ N.A. | 13 (2.4%)                      | 20 (3.7%)  | 13 (2.4%) | 1 (0.2%) | 3 (0.6%)   |
|                           | 2+ A.   | 2 (0.4%)                       | 4 (0.7%)   | 1 (0.2%)  | 2 (0.4%) | 11 (2%)    |
|                           | 3+      | 4 (0.7%)                       | 15 (2.8%)  | 3 (0.6%)  | 6 (1.1%) | 78 (14.3%) |

(2 patients in the primary cohort and 6 patients in the recurrent cohort had IHC scores 0 or 1+ with *HER2* gene amplification by FISH)

Abbreviations; N.A., *HER2* not amplified by FISH; A., *HER2* amplified by FISH

**Supplementary Figure 2** A) Kaplan Meier curves patients with HR-positive/HER2-negative phenotype in both primary and recurrent BC samples, according to HER2-low expression evolution from primary to recurrent BC B) Kaplan-Meier curves for PRS and C) OS in patients maintaining a HR-positive/HER2-negative BC phenotype from primary to recurrent BC, according to HER2-low expression on primary BC.

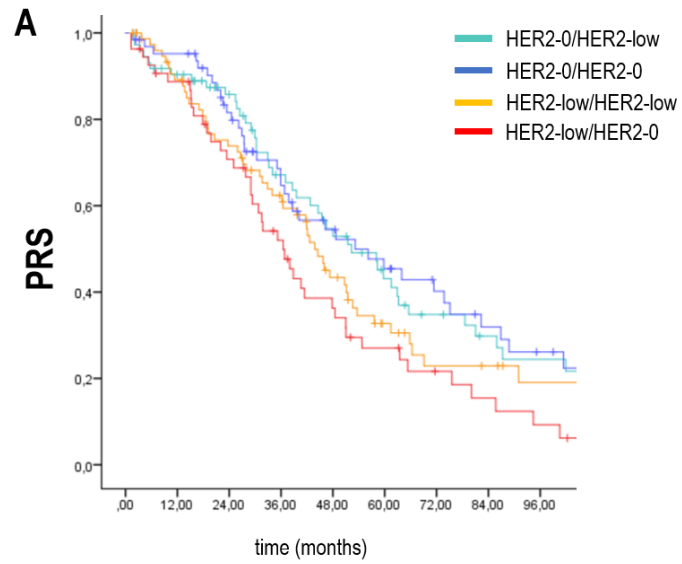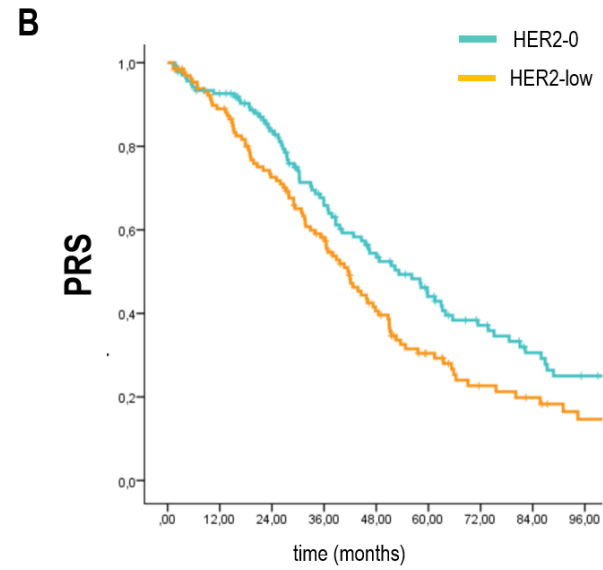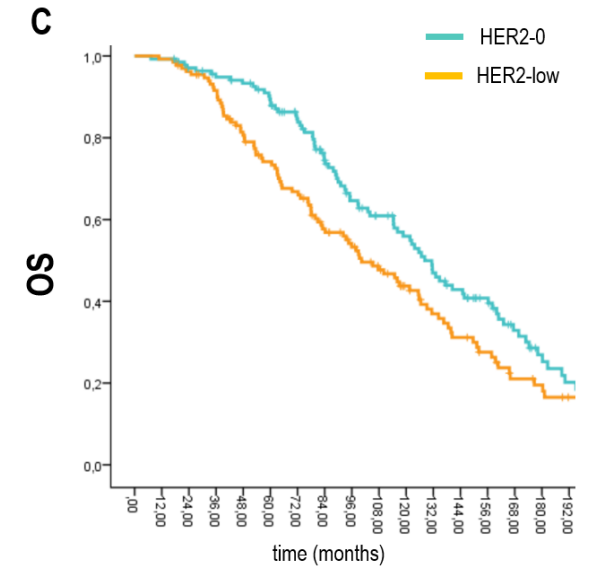

Supplement: 41523_2021_343_MOESM2_ESM.pdf [file 41523_2021_343_MOESM2_ESM.pdf]
